# Supplementary material for: Confirmatory non-invasive and non-destructive differentiation between hemp and cannabis using a hand-held Raman spectrometer
Source: Royal Society of Chemistry journal article supplement (doi:10.1039/c9ra08225e), 2020-01-01
Supplement: c9ra08225e1.pdf [file c9ra08225e1.pdf]

# Confirmatory Non-Invasive and Non-Destructive Differentiation Between Hemp and Cannabis Using A Hand-Held Raman Spectrometer

Lee Sanchez<sup>1</sup>, Conor Filter<sup>2</sup>, David Baltensperger<sup>3</sup> and Dmitry Kurouski<sup>\*1,4</sup>

1. Department of Biochemistry and Biophysics, Texas A&M University, College Station, Texas 77843, United States
2. Texas Farm & Process, LLC, Fort Worth, Texas 76102, United States
3. Department of Soil and Crop Sciences, Texas A&M University, College Station, Texas 77843, United States
4. The Institute for Quantum Science and Engineering, Texas A&M University, College Station, Texas, 77843, United States

## Supplementary Information

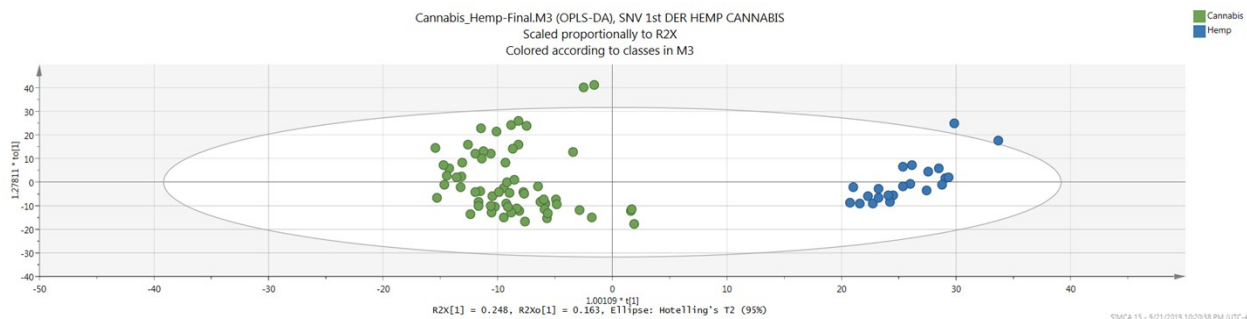

Figure S1. OPLS-DA loadings plot of Raman spectra collected from cannabis (green) and hemp (blue).

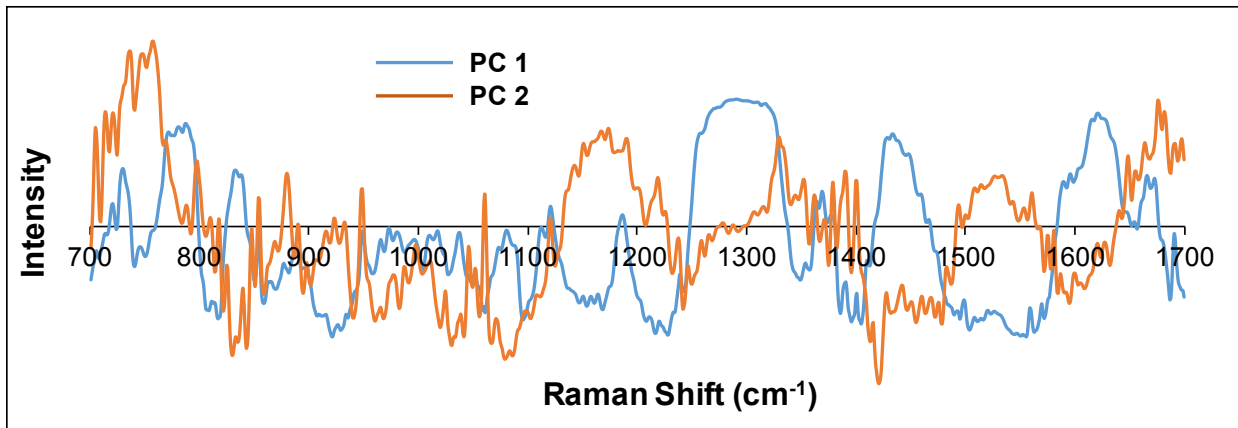

Figure S2. Loading plot of two predictive components in the Raman spectra of three different cannabis varieties.

### CANNABINOID PROFILE

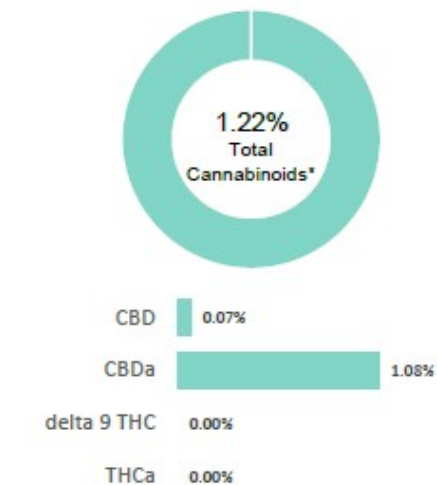

| Compound                                     | LOQ (%) | Result (%)  | Result (mg/g) |
|----------------------------------------------|---------|-------------|---------------|
| Delta 9-Tetrahydrocannabinolic acid (THCA-A) | 0.07    | 0.00        | 0.0           |
| Delta 9-Tetrahydrocannabinol (Delta 9THC)    | 0.04    | 0.00        | 0.0           |
| Cannabidiolic acid (CBDA)                    | 0.08    | 1.08        | 10.8          |
| Cannabidiol (CBD)                            | 0.05    | 0.07        | 0.7           |
| Delta 8-Tetrahydrocannabinol (Delta 8THC)    | 0.04    | 0.00        | 0.0           |
| Cannabinolic Acid (CBNA)                     | 0.10    | 0.00        | 0.0           |
| Cannabinol (CBN)                             | 0.04    | 0.00        | 0.0           |
| Cannabigerolic acid (CBGA)                   | 0.06    | 0.00        | 0.0           |
| Cannabigerol (CBG)                           | 0.04    | 0.00        | 0.0           |
| Tetrahydrocannabivarinic Acid (THCVA)        | 0.06    | 0.00        | 0.0           |
| Tetrahydrocannabivarin (THCV)                | 0.03    | 0.00        | 0.0           |
| Cannabidivarinic Acid (CBDVA)                | 0.08    | 0.00        | 0.0           |
| Cannabidivarin (CBDV)                        | 0.04    | 0.00        | 0.0           |
| Cannabichromenic Acid (CBCA)                 | 0.06    | 0.07        | 0.7           |
| Cannabichromene (CBC)                        | 0.07    | 0.00        | 0.0           |
| <b>Total Cannabinoids</b>                    |         | <b>1.22</b> | <b>12.20</b>  |
| <b>Total Potential THC**</b>                 |         | <b>0.00</b> | <b>0.00</b>   |
| <b>Total Potential CBD**</b>                 |         | <b>1.02</b> | <b>10.17</b>  |

NOTES:

N/A

% = % (w/w) = Percent (Weight of Analyte / Weight of Product)

\* Total Cannabinoids result reflects the absolute sum of all cannabinoids detected.

\*\* Total Potential THC/CBD is calculated using the following formulae to take into account the loss of a carboxyl group during decarboxylation step.

Total THC = THC + (THCa \*(0.877)) and Total CBD = CBD + (CBDA \*(0.877))

### Results of HPLC analysis of hemp standard

## CANNABINOID PROFILE

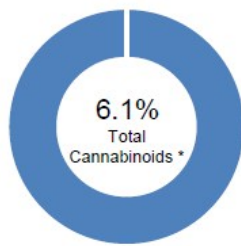

- Total Potential THC 5.37% \*\*
- Total Potential CBD 0% \*\*

6.12%

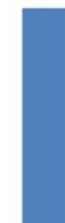

0.00%

THC  
0 mg/g

0.00%

CBDA  
0 mg/g

0.00%

CBD  
0 mg/g

0.00%

CBN  
0 mg/g

0.00%

CBG  
0 mg/g

\* Total Cannabinoids result reflects the absolute sum of all cannabinoids detected.

\*\* Total Potential THC/CBD is calculated using the following formulas to take into account the loss of a carboxyl group during decarboxylation step.

Total THC = THC + (THCa \*(0.877)) and Total CBD = CBD + (CBDA \*(0.877))

% = % (w/w) = Percent (Weight of Analyte / Weight of Product)

## Results of HPLC analysis of GC cannabis

### CANNABINOID PROFILE

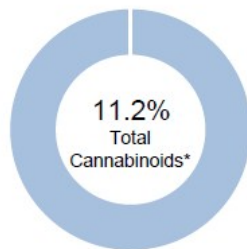

THCa 10.31%

delta 9 THC 0.06%

CBDA 0.00%

CBD 0.00%

| Compound                                     | LOQ (%) | Result (%)   | Result (mg/g) |
|----------------------------------------------|---------|--------------|---------------|
| Delta 9-Tetrahydrocannabinolic acid (THCA-A) | 0.10    | 10.31        | 103.1         |
| Delta 9-Tetrahydrocannabinol (Delta 9THC)    | 0.05    | 0.06         | 0.6           |
| Cannabidiolic acid (CBDA)                    | 0.09    | 0.00         | 0.0           |
| Cannabidiol (CBD)                            | 0.05    | 0.00         | 0.0           |
| Delta 8-Tetrahydrocannabinol (Delta 8THC)    | 0.05    | 0.00         | 0.0           |
| Cannabinolic Acid (CBNA)                     | 0.13    | 0.00         | 0.0           |
| Cannabinol (CBN)                             | 0.06    | 0.00         | 0.0           |
| Cannabigerolic acid (CBGA)                   | 0.08    | 0.71         | 7.1           |
| Cannabigerol (CBG)                           | 0.05    | 0.00         | 0.0           |
| Tetrahydrocannabivarinic Acid (THCVA)        | 0.08    | 0.00         | 0.0           |
| Tetrahydrocannabivarin (THCV)                | 0.08    | 0.00         | 0.0           |
| Cannabidivarinic Acid (CBDVA)                | 0.08    | 0.00         | 0.0           |
| Cannabidivarin (CBDV)                        | 0.05    | 0.00         | 0.0           |
| Cannabichromenic Acid (CBCA)                 | 0.07    | 0.12         | 1.2           |
| Cannabichromene (CBC)                        | 0.09    | 0.00         | 0.0           |
| <b>Total Cannabinoids</b>                    |         | <b>11.20</b> | <b>112.00</b> |
| <b>Total Potential THC**</b>                 |         | <b>9.10</b>  | <b>91.02</b>  |
| <b>Total Potential CBD**</b>                 |         | <b>0.00</b>  | <b>0.00</b>   |

#### NOTES:

Free from visual mold, mildew, and foreign matter.

% = % (w/w) = Percent (Weight of Analyte / Weight of Product)

\* Total Cannabinoids result reflects the absolute sum of all cannabinoids detected.

\*\* Total Potential THC/CBD is calculated using the following formulas to take into account the loss of a carboxyl group during decarboxylation step.

Total THC = THC + (THCa \*(0.877)) and Total CBD = CBD + (CBDA \*(0.877))

## Results of HPLC analysis of TCC cannabis

## CANNABINOID PROFILE

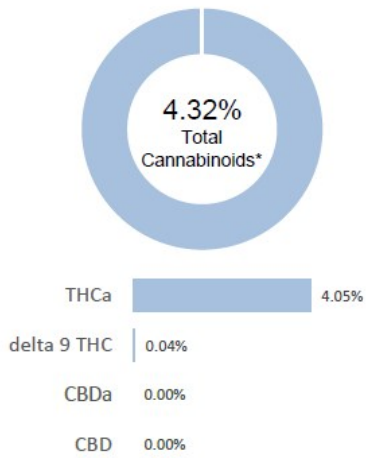

% = % (w/w) = Percent (Weight of Analyte / Weight of Product)

\* Total Cannabinoids result reflects the absolute sum of all cannabinoids detected.

\*\* Total Potential THC/CBD is calculated using the following formulas to take into account the loss of a carboxyl group during decarboxylation step.

Total THC = THC + (THCa \* (0.877)) and Total CBD = CBD + (CBDa \* (0.877))

| Compound                                     | LOQ (%) | Result (%)  | Result (mg/g) |
|----------------------------------------------|---------|-------------|---------------|
| Delta 9-Tetrahydrocannabinolic acid (THCA-A) | 0.08    | 4.05        | 40.5          |
| Delta 9-Tetrahydrocannabinol (Delta 9THC)    | 0.04    | 0.04        | 0.4           |
| Cannabidiolic acid (CBDA)                    | 0.08    | 0.00        | 0.0           |
| Cannabidiol (CBD)                            | 0.05    | 0.00        | 0.0           |
| Delta 8-Tetrahydrocannabinol (Delta 8THC)    | 0.04    | 0.00        | 0.0           |
| Cannabinolic Acid (CBNA)                     | 0.10    | 0.00        | 0.0           |
| Cannabinol (CBN)                             | 0.05    | 0.00        | 0.0           |
| Cannabigerolic acid (CBGA)                   | 0.07    | 0.23        | 2.3           |
| Cannabigerol (CBG)                           | 0.04    | 0.00        | 0.0           |
| Tetrahydrocannabivarinic Acid (THCVA)        | 0.06    | 0.00        | 0.0           |
| Tetrahydrocannabivarin (THCV)                | 0.08    | 0.00        | 0.0           |
| Cannabidivarinic Acid (CBDVA)                | 0.08    | 0.00        | 0.0           |
| Cannabidivarin (CBDV)                        | 0.04    | 0.00        | 0.0           |
| Cannabichromenic Acid (CBCA)                 | 0.06    | 0.00        | 0.0           |
| Cannabichromene (CBC)                        | 0.07    | 0.00        | 0.0           |
| <b>Total Cannabinoids</b>                    |         | <b>4.32</b> | <b>43.20</b>  |
| <b>Total Potential THC**</b>                 |         | <b>3.59</b> | <b>35.92</b>  |
| <b>Total Potential CBD**</b>                 |         | <b>0.00</b> | <b>0.00</b>   |

### NOTES:

Free from visual mold, mildew, and foreign matter.

## Results of HPLC analysis of TS cannabis
